# Supplementary material for: Prostaglandin F2 Receptor Negative Regulator Drives Cancer Stemness and Immune Evasion in Hepatocellular Carcinoma cells
Source: Research Square preprint supplement (doi:10.21203/rs.3.rs-7707501/v1), 2025-10-15
Supplement: Supplementary file 1 [file 174ecf735803f1931d05fa74.docx]

| Name | Sequence | Reference  / Supplier |
| --- | --- | --- |
| Primers for human PTGFRN | Forward: 5’-ACAACAGCTGGGTGAAAAGC-3’  Reverse: 5’-TTTCATTGGGACTGGAGAGG-3’ | Transl Res, 2018. 201: p. 84-97 |
| Primers for human GAPDH | Forward: 5’-ACAGCGACACCCACTCCTCC-3’  Reverse: 5’-GAGGTCCACCACCCTGTTGC-3’ | Cancer Lett, 2019. 454: p. 44-52 |
| shScramble | Tet-pLKO-puro-Scrambled | Addgene #47541 |
| shPTGFRN#1  (shP#1) | 5’-ctagcGCCTTTGATGTGTCCTGGTTTtactagtAAACCAGGACACATCAAAGGCTTTTTg-3’​ | TRCN0000057448 |
| 5’-aattcAAAAAGCCTTTGATGTGTCCTGGTTTactagtaAAACCAGGACACATCAAAGGCg-3’​ |
| shPTGFRN#2  (shP#2) | 5’-ctagcCCTATTGAGATAGACTTCCAAtactagtTTGGAAGTCTATCTCAATAGGTTTTTg-3’​ | TRCN0000057452 |
| 5’-aattcAAAAACCTATTGAGATAGACTTCCAAactagtaTT  GGAAGTCTATCTCAATAGGg-3’ |
| shPTGFRN#3  (shP#3) | 5’-ctagcCCAGGACTTTGGCAACTACTATACTAGTTAGTAGTTGCCAAAGTCCTGGTTTTTG-3’ | TRCN0000057450 |
| 5’-aattcAAAAACCAGGACTTTGGCAACTACTAactagtaTAGTAGTTGCCAAAGTCCTGG-3’ |

**Table S1. Primers and shRNAs used in this study**
